# Supplementary material for: Inducible Rbpms-CreERT2 Mouse Line for Studying Gene Function in Retinal Ganglion Cell Physiology and Disease
Source: MDPI journal article supplement (doi:10.3390/cells12151951), 2023-07-27
Supplement: s1 [file s1]

**Table S1. Relative cell number.**

|                                   | +/+           | <i>Rbpms</i> <sup>CreERT2/+</sup>            | <i>Rbpms</i> <sup>CreERT2/CreERT2</sup>      |
|-----------------------------------|---------------|----------------------------------------------|----------------------------------------------|
| <sup>WM</sup> RBPMs <sup>+</sup>  | 304.3 ± 59.7  | 285.9 ± 51.3 <sup>#</sup> <i>P</i> = 0.3799  | 281.3 ± 50.5 <sup>#</sup> <i>P</i> = 0.2782  |
| <sup>WM</sup> POU4F1 <sup>+</sup> | 245.7 ± 55.7  | 230.7 ± 48.3 <sup>#</sup> <i>P</i> = 0.4711  | 237.3 ± 49.0 <sup>#</sup> <i>P</i> = 0.7901  |
| H&E (in GCL)                      | 45.1 ± 8.3    | 45.3 ± 7.4 <sup>#</sup> <i>P</i> = 0.9965    | 41.4 ± 8.6 <sup>#</sup> <i>P</i> = 0.3138    |
| H&E (in INL)                      | 546.0 ± 34.8  | 573.0 ± 12.4 <sup>#</sup> <i>P</i> = 0.7132  | 546.3 ± 29.0 <sup>#</sup> <i>P</i> > 0.9999  |
| H&E (in ONL)                      | 1589.3 ± 62.2 | 1504.0 ± 16.3 <sup>#</sup> <i>P</i> = 0.1696 | 1578.7 ± 50.0 <sup>#</sup> <i>P</i> = 0.9566 |

WM indicates whole mount; H&E means hematoxylin and eosin. GCL indicates ganglion cell layer, INL and ONL denote inner nuclear layer and outer nuclear layer, respectively. <sup>#</sup>represent *P* value v.s. +/+. Data represent the mean ± SEM.
