# Supplementary material for: Inducible Rbpms-CreERT2 Mouse Line for Studying Gene Function in Retinal Ganglion Cell Physiology and Disease
Source: MDPI journal article supplement (doi:10.3390/cells12151951), 2023-07-27
Supplement: s1 [file s1]

**Table S3. Relative amplitude of a wave and b wave in photopic ffERG.**

| Amplitude<br>( $\mu\text{V}$ ) | Luminance<br>( $\text{cd.s/m}^2$ ) | +/+              | $Rbpms^{CreERT2/+}$                        | $Rbpms^{CreERT2/CreERT2}$                  |
|--------------------------------|------------------------------------|------------------|--------------------------------------------|--------------------------------------------|
| a wave<br>(negative)           | 3                                  | $15.4 \pm 3.6$   | $18.4 \pm 2.5$ <sup>#</sup> $P = 0.6857$   | $14.2 \pm 5.7$ <sup>#</sup> $P = 0.9458$   |
|                                | 10                                 | $23.0 \pm 2.2$   | $22.3 \pm 2.5$ <sup>#</sup> $P = 0.9777$   | $17.9 \pm 4.9$ <sup>#</sup> $P = 0.3396$   |
|                                | 25                                 | $25.6 \pm 2.3$   | $22.8 \pm 1.8$ <sup>#</sup> $P = 0.7276$   | $23.3 \pm 5.1$ <sup>#</sup> $P = 0.8068$   |
|                                | 50                                 | $28.3 \pm 1.1$   | $25.8 \pm 3.2$ <sup>#</sup> $P = 0.7820$   | $28.9 \pm 8.4$ <sup>#</sup> $P = 0.9816$   |
|                                | 100                                | $29.7 \pm 2.2$   | $29.8 \pm 2.5$ <sup>#</sup> $P = 0.9996$   | $26.5 \pm 6.5$ <sup>#</sup> $P = 0.6493$   |
|                                | 150                                | $31.5 \pm 1.6$   | $27.0 \pm 4.5$ <sup>#</sup> $P = 0.4285$   | $27.9 \pm 8.7$ <sup>#</sup> $P = 0.5696$   |
| b wave<br>(positive)           | 3                                  | $113.8 \pm 18.1$ | $107.8 \pm 14.9$ <sup>#</sup> $P = 0.9440$ | $98.4 \pm 22.6$ <sup>#</sup> $P = 0.6826$  |
|                                | 10                                 | $132.6 \pm 19.8$ | $126.5 \pm 15.1$ <sup>#</sup> $P = 0.9421$ | $111.2 \pm 26.6$ <sup>#</sup> $P = 0.4819$ |
|                                | 25                                 | $154.5 \pm 16.6$ | $135.6 \pm 19.9$ <sup>#</sup> $P = 0.5629$ | $121.3 \pm 33.2$ <sup>#</sup> $P = 0.1793$ |
|                                | 50                                 | $160.4 \pm 17.3$ | $141.2 \pm 13.0$ <sup>#</sup> $P = 0.5553$ | $130.6 \pm 36.4$ <sup>#</sup> $P = 0.2483$ |
|                                | 100                                | $166.2 \pm 16.8$ | $144.3 \pm 14.1$ <sup>#</sup> $P = 0.4668$ | $134.5 \pm 31.0$ <sup>#</sup> $P = 0.2075$ |
|                                | 150                                | $176.3 \pm 14.0$ | $148.8 \pm 17.5$ <sup>#</sup> $P = 0.3049$ | $137.2 \pm 35.6$ <sup>#</sup> $P = 0.0957$ |

ffERG indicates full-field electroretinography. <sup>#</sup>represent  $P$  value v.s. +/+. Data represent the mean  $\pm$  SEM.
