# Supplementary material for: Inducible Rbpms-CreERT2 Mouse Line for Studying Gene Function in Retinal Ganglion Cell Physiology and Disease
Source: MDPI journal article supplement (doi:10.3390/cells12151951), 2023-07-27
Supplement: s1 [file s1]

**Table S4. Relative amplitude of P1-N2 in PERG.**

| Amplitude (μV) | Luminance (cd.s/m <sup>2</sup> ) | +/+        | <i>Rbpms</i> <sup>CreERT2/+</sup>         | <i>Rbpms</i> <sup>CreERT2/CreERT2</sup>   |
|----------------|----------------------------------|------------|-------------------------------------------|-------------------------------------------|
| P1-N2          | 50                               | 21.4 ± 5.9 | 30.9 ± 8.6 <sup>#</sup> <i>P</i> = 0.0917 | 27.5 ± 9.0 <sup>#</sup> <i>P</i> = 0.3421 |

PERG indicates pattern electroretinography. <sup>#</sup> represent *P* value v.s. +/+. Data represent the mean ± SEM.

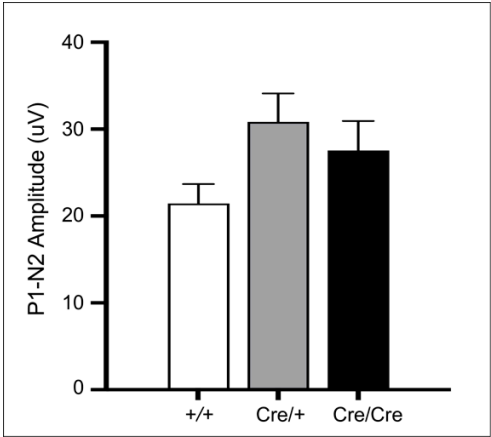

The P1-N2 amplitude was measured from the P1 peak to the nadir of N2.
