# Supplementary material for: Inducible Rbpms-CreERT2 Mouse Line for Studying Gene Function in Retinal Ganglion Cell Physiology and Disease
Source: MDPI journal article supplement (doi:10.3390/cells12151951), 2023-07-27
Supplement: s1 [file s1]

**Table S2. Relative amplitude of a wave and b wave in scotopic ffERG.**

| Amplitude<br>( $\mu\text{V}$ ) | Luminance<br>( $\text{cd.s/m}^2$ ) | +/+               | <i>Rbpms</i> <sup>CreERT2/+</sup>               | <i>Rbpms</i> <sup>CreERT2/CreERT2</sup>          |
|--------------------------------|------------------------------------|-------------------|-------------------------------------------------|--------------------------------------------------|
| a wave<br>(negative)           | 0.001                              | 52.1 $\pm$ 3.3    | 43.3 $\pm$ 8.2 <sup>#</sup> <i>P</i> = 0.8951   | 41.8 $\pm$ 8.1 <sup>#</sup> <i>P</i> = 0.8587    |
|                                | 0.005                              | 19.9 $\pm$ 7.8    | 21.2 $\pm$ 7.4 <sup>#</sup> <i>P</i> = 0.9978   | 21.4 $\pm$ 9.2 <sup>#</sup> <i>P</i> = 0.9971    |
|                                | 0.01                               | 42.9 $\pm$ 6.6    | 39.0 $\pm$ 7.3 <sup>#</sup> <i>P</i> = 0.9778   | 55.0 $\pm$ 8.6 <sup>#</sup> <i>P</i> = 0.8134    |
|                                | 0.1                                | 231.5 $\pm$ 32.4  | 213.0 $\pm$ 29.1 <sup>#</sup> <i>P</i> = 0.6118 | 225.0 $\pm$ 26.2 <sup>#</sup> <i>P</i> = 0.9393  |
|                                | 0.5                                | 344.4 $\pm$ 17.9  | 307.0 $\pm$ 27.9 <sup>#</sup> <i>P</i> = 0.1469 | 321.2 $\pm$ 35.7 <sup>#</sup> <i>P</i> = 0.4679  |
|                                | 1                                  | 346.9 $\pm$ 27.9  | 321.5 $\pm$ 32.1 <sup>#</sup> <i>P</i> = 0.4050 | 338.0 $\pm$ 55.7 <sup>#</sup> <i>P</i> = 0.8912  |
| b wave<br>(positive)           | 0.001                              | 432.1 $\pm$ 49.3  | 400.5 $\pm$ 37.8 <sup>#</sup> <i>P</i> = 0.8421 | 423.1 $\pm$ 67.3 <sup>#</sup> <i>P</i> = 0.9862  |
|                                | 0.005                              | 416.7 $\pm$ 54.3  | 380.0 $\pm$ 41.0 <sup>#</sup> <i>P</i> = 0.7889 | 416.0 $\pm$ 49.3 <sup>#</sup> <i>P</i> = 0.9999  |
|                                | 0.01                               | 429.0 $\pm$ 65.9  | 435.0 $\pm$ 43.4 <sup>#</sup> <i>P</i> = 0.9930 | 461.5 $\pm$ 47.1 <sup>#</sup> <i>P</i> = 0.8295  |
|                                | 0.1                                | 547.9 $\pm$ 128.0 | 552.3 $\pm$ 43.0 <sup>#</sup> <i>P</i> = 0.9966 | 581.5 $\pm$ 79.6 <sup>#</sup> <i>P</i> = 0.8233  |
|                                | 0.5                                | 687.4 $\pm$ 63.0  | 641.1 $\pm$ 28.4 <sup>#</sup> <i>P</i> = 0.6933 | 671.2 $\pm$ 87.3 <sup>#</sup> <i>P</i> = 0.9561  |
|                                | 1                                  | 682.1 $\pm$ 106.4 | 671.8 $\pm$ 25.0 <sup>#</sup> <i>P</i> = 0.9816 | 679.1 $\pm$ 115.8 <sup>#</sup> <i>P</i> = 0.9984 |

ffERG indicates full-field electroretinography. <sup>#</sup>represent *P* value v.s. +/+. Data represent the mean  $\pm$  SEM.
