# Supplementary material for: Inducible Rbpms-CreERT2 Mouse Line for Studying Gene Function in Retinal Ganglion Cell Physiology and Disease
Source: Cells. 2023 Jul 27;12(15):1951. doi: 10.3390/cells12151951 (PMC10416940; doi:10.3390/cells12151951)
Supplement: Supplementary file 1 [file cells-12-01951-s001.zip]

Archive with 6 entries (6 files):
- Figure S1. Generation and basic physiology assessment of Rbpms-CreERT2 mice. .pdf
- Figure S2. Absence of Cre recombinase activity in uninduced Rbpms-CreERT2_+; Rosa26tdT_+ mice. .pdf
- Table S1. Relative cell number.pdf
- Table S2. Relative amplitude of a wave and b wave in scotopic ffERG.pdf
- Table S3. Relative amplitude of a wave and b wave in photopic ffERG.pdf
- Table S4. Relative amplitude of P1-N2 in PERG.pdf
